# Supplementary material for: Monocyte bioenergetics: An immunometabolic perspective in metabolic dysfunction-associated steatohepatitis
Source: PubMed Central journal article supplement (PMC11148801; doi:10.1016/j.xcrm.2024.101564), 2024-05-10
Supplement: mmc1.pdf [file mmc1.pdf]

**Cell Reports Medicine, Volume 5**

**Supplemental information**

**Monocyte bioenergetics:**

**An immunometabolic perspective in metabolic  
dysfunction-associated steatohepatitis**

**Moris Sangineto, Martina Ciarnelli, Tommaso Colangelo, Archana Moola, Vidyasagar Naik  
Bukke, Loren Duda, Rosanna Villani, Antonino Romano, Stefania Giandomenico, Hina  
Kanwal, and Gaetano Serviddio**

## **Monocyte bioenergetics: an immunometabolic perspective in metabolic dysfunction-associated steatohepatitis**

Moris Sangineto<sup>1##</sup>, Martina Ciarnelli<sup>1</sup>, Tommaso Colangelo<sup>2,3</sup>, Archana Moola<sup>1</sup>, Vidyasagar Naik Bukke<sup>1</sup>, Loren Duda<sup>4</sup>, Rosanna Villani<sup>1</sup>, Antonino Romano<sup>1</sup>, Stefania Giandomenico<sup>1</sup>, Hina Kanwal<sup>1</sup>, Gaetano Serviddio<sup>1</sup>

1 C.U.R.E. (University Center for Liver Disease Research and Treatment), Liver Unit, Department of Medical and Surgical Sciences, University of Foggia, Foggia, Italy

2 Department of Medical and Surgical Sciences, University of Foggia, Foggia, Italy

3 Cancer Cell Signalling Unit, Fondazione IRCCS “Casa Sollievo della Sofferenza”, San Giovanni Rotondo (FG), Italy

4 Pathology Unit, Department of Clinical and Experimental Medicine, University of Foggia, Foggia, Italy

**#Corresponding author:** Moris Sangineto, C.U.R.E. (University Center for Liver Disease Research and Treatment), Liver Unit, Department of Medical and Surgical Sciences, University of Foggia, Foggia, Italy

**Email:** [moris.sangineto@unifg.it](mailto:moris.sangineto@unifg.it)

**\*Lead contact:** Moris Sangineto, C.U.R.E. (University Center for Liver Disease Research and Treatment), Liver Unit, Department of Medical and Surgical Sciences, University of Foggia, Foggia, Italy

**Email:** [moris.sangineto@unifg.it](mailto:moris.sangineto@unifg.it)

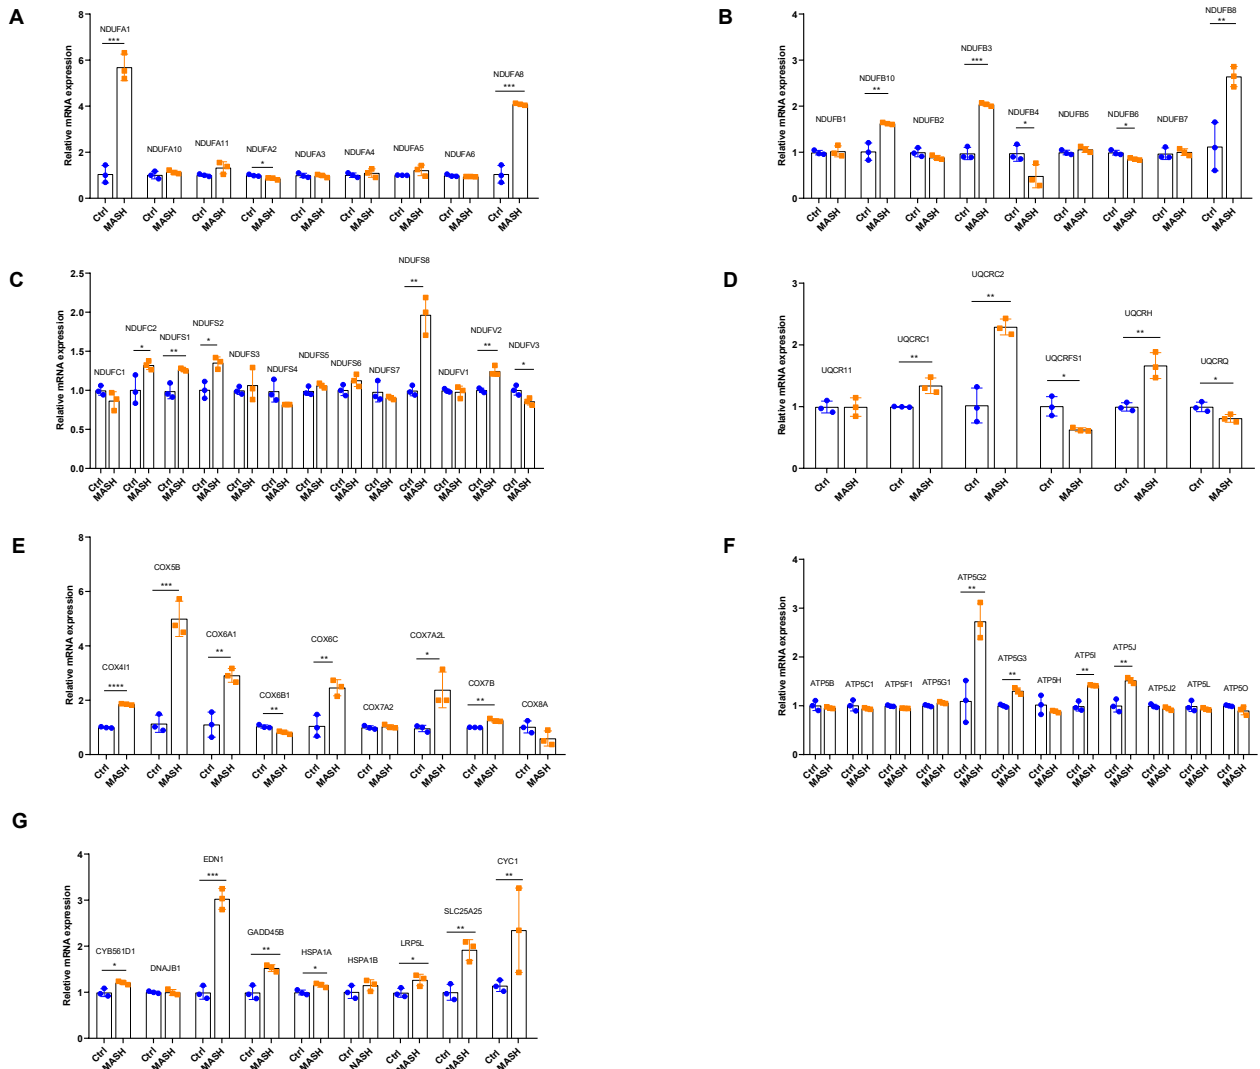

**Figure S1. Relative mRNA expression of genes involved in mitochondrial energy metabolism ctrl and MASH Mo.**

**Related to Figure 4.**

Determined by qPCR (n= 3 per group) using PrimePCRTM array “Mitochondria Energy Metabolism Plus” (Bio-Rad Laboratories Inc).

Data are expressed in mean  $\pm$  SEM; \*p<0.05; \*\*p<0.01; \*\*\*p<0.001, \*\*\*\*p<0.0001 according to two-tailed Student’s T test.

Genes are listed in supplementary table 2.

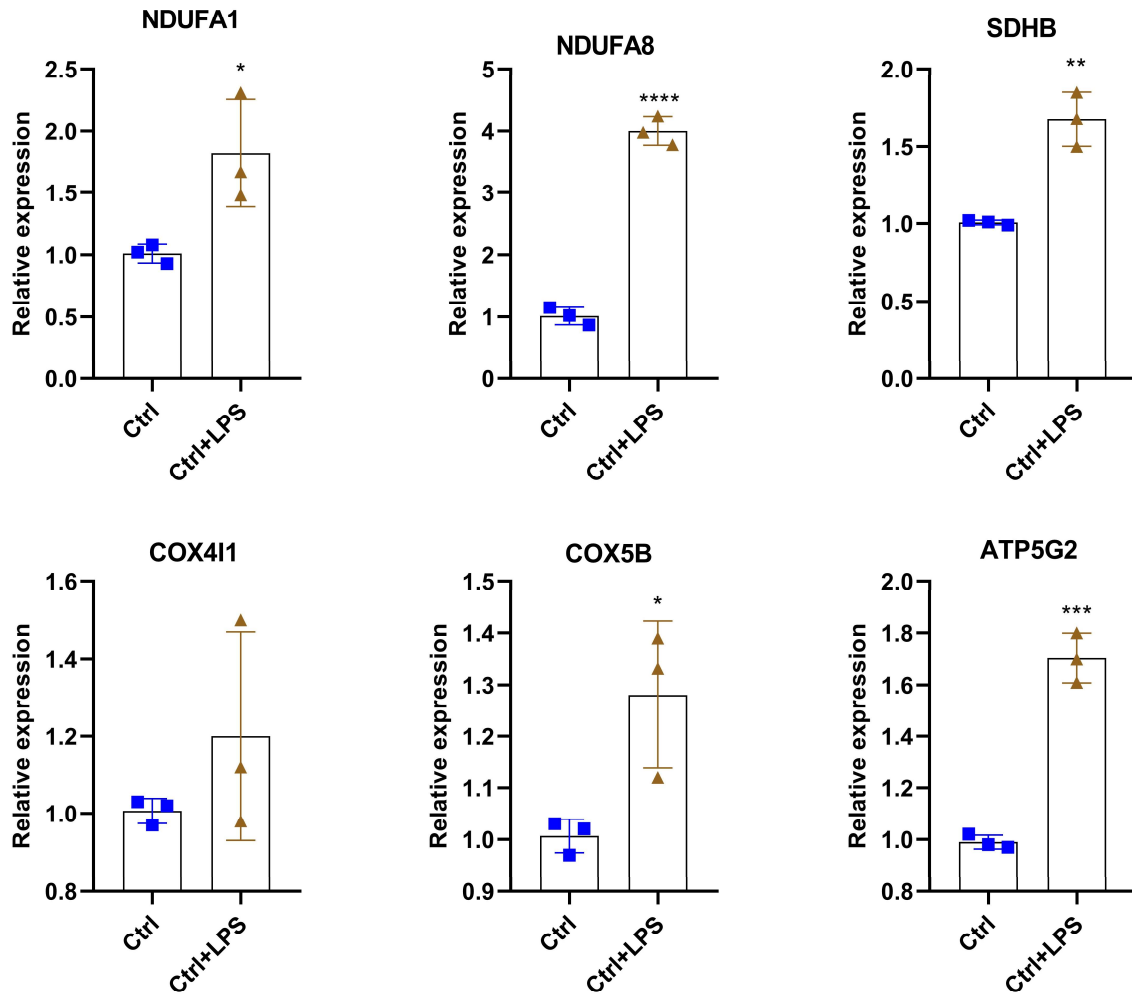

Figure S2. LPS induces expression of ETC subunits in healthy monocytes. Related to Figure 2 and Figure 4. Determined by qPCR (n=3 per group).

**A**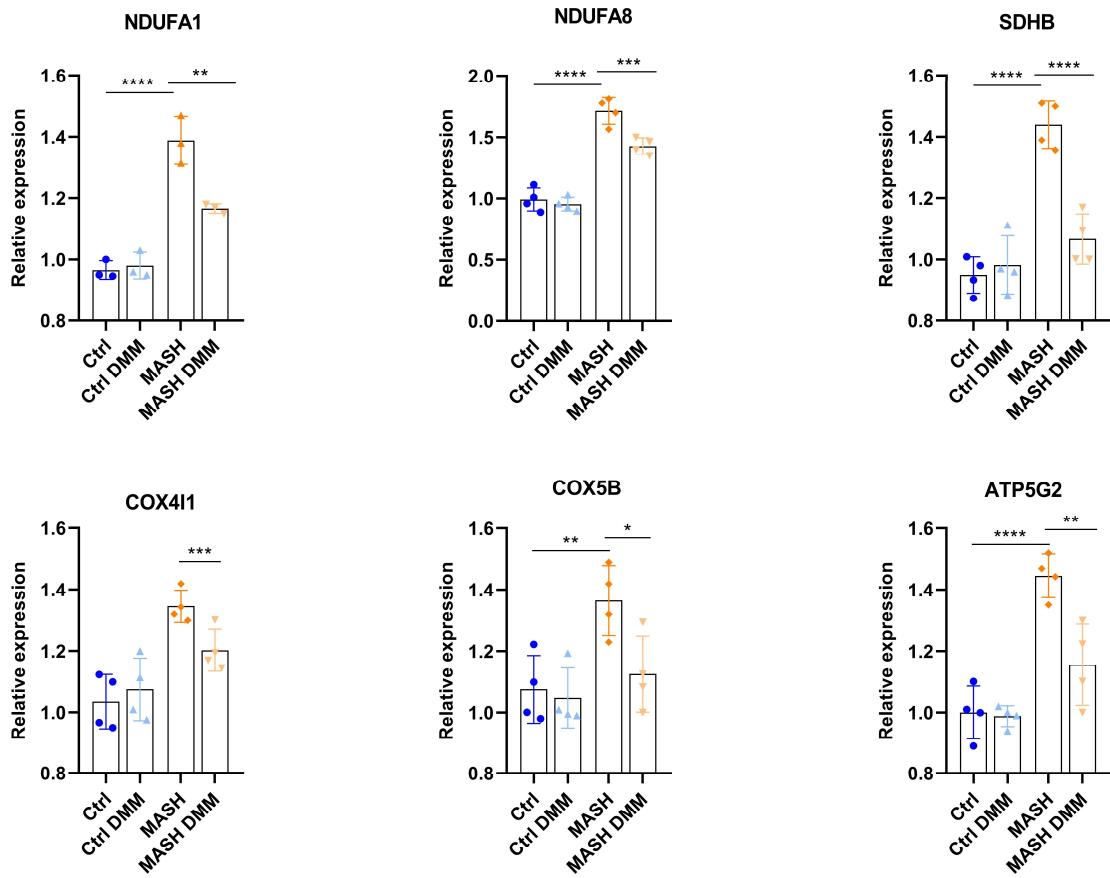**B**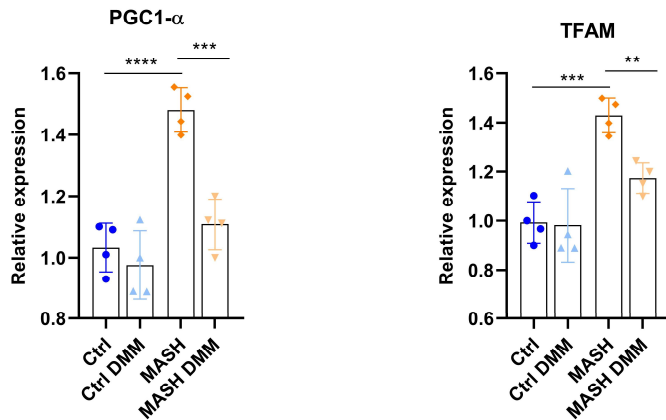

**Figure S3. DMM dampens the expression of ETC subunits in MASH Mo. Related to Figure 5.**

(A) Relative mRNA expression of ETC subunits ctrl and MASH Mo +/- DMM (10 mM) for 4 h (n= 4 per group), determined by qPCR.

(B) Relative mRNA expression of mitochondrial biogenesis markers (*Pgc1- $\alpha$*  and *Tfam*) in ctrl and MASH Mo +/- DMM (10 mM) for 4 h (n= 4 per group), determined by qPCR.

Data are expressed in mean  $\pm$  SEM; \* $p$ <0.05; \*\* $p$ <0.01; \*\*\* $p$ <0.001, \*\*\*\* $p$ <0.0001 according to one-Way ANOVA followed by post hoc analysis (Bonferroni test). DMM, dimethyl malonate; Mo, monocytes; ETC, electron transport chain; PGC-1 $\alpha$ , Peroxisome-proliferator-activated receptor-gamma coactivator-1 $\alpha$ ; TFAM, Transcription factor A, mitochondrial.

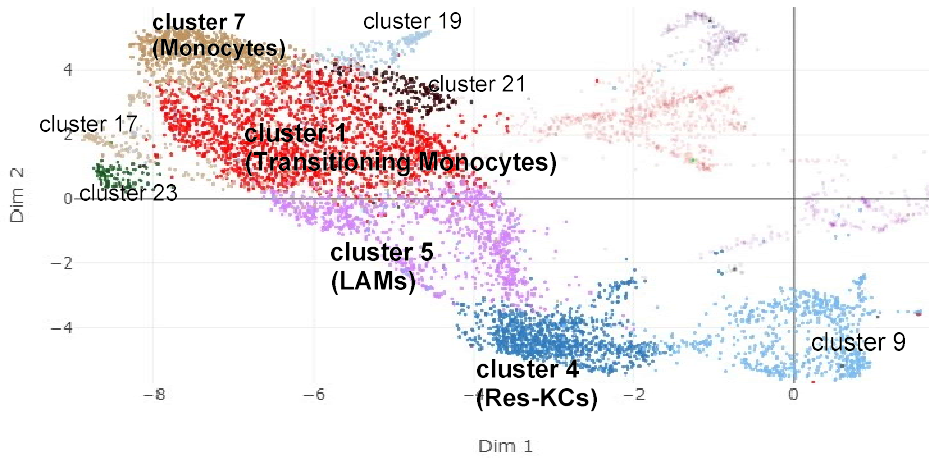

**Figure S4. The monocyte-macrophage UMAP based on expression of *Mafb*, *Ly6c2*, *Fcgr1* and *Adgre1*. Related to Figure 6.**

UMAP was generated from PCA and data processing of public scRNA-seq dataset (GSE156057) using 24-weeks western diet fed mouse.

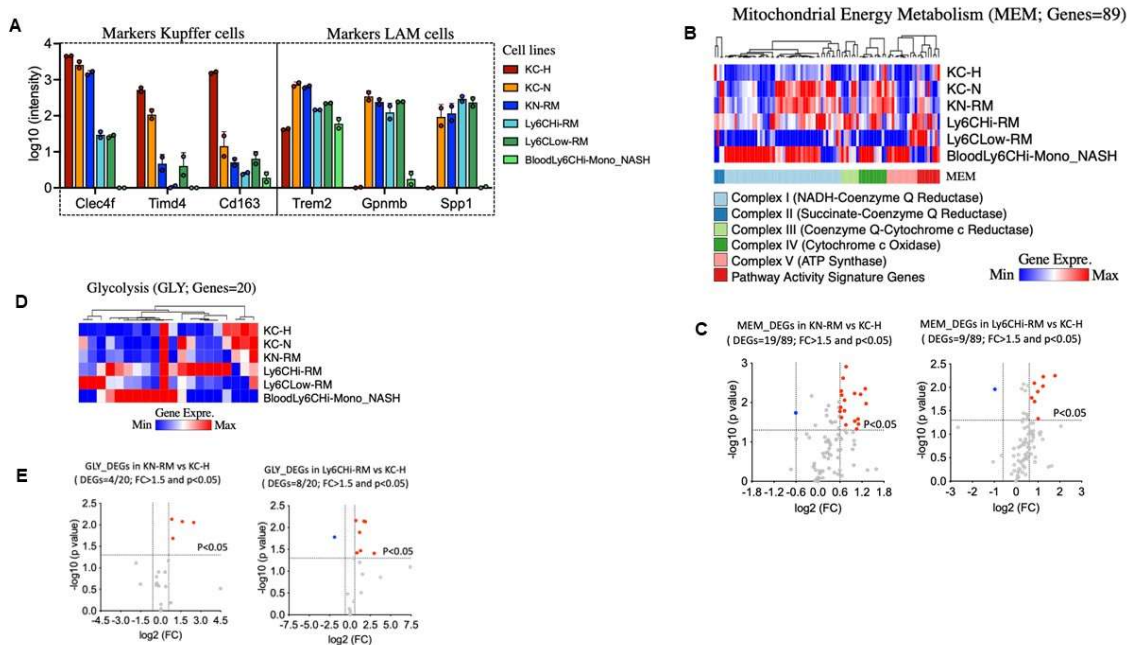

**Figure S5. Higher expression of energy pathways in monocyte-derived macrophages compared to normal Kupffer cells in MASH. Related to Figure 6.**

(A) Expression of Kupffer cell markers (*Clec4f*, *Timd4* and *Cd163*) and LAM markers (*Spp1*, *Gpnmb* and *Trem2*) in macrophagic populations isolated from murine MASH livers. (B) Hierarchical clustering and heatmap analyses of 89

genes included in Mitochondrial Energy Metabolism (MEM) pathway. (C) Volcano plot representing MEM\_DEGs in KN-RM vs KC-H and Ly6c<sup>high</sup> vs KC-H with a p value<0.05 and FC>1.5. (D) Hierarchical clustering and heatmap analyses of 20 genes included in Glycolysis (GLY) pathway. (E) Volcano plot representing GLY\_DEGs in KN-RM vs KC-H and Ly6c<sup>high</sup> vs KC-H with a p value<0.05 and FC>1.5. Normalized RNAseq data for different myeloid cell populations in NASH were used from GEO database (GSE128337). Differences were detected with two-tailed Student's T test.

Seidman JS et al<sup>1</sup> firstly identified that KC of healthy livers (KC-H) are substituted during MASH by a macrophagic diversity including KC-NASH (KC-N), and different Mo-MØ: Kupffer-niche recruited macrophages (KN-RM), Ly6C<sup>high</sup> and Ly6C<sup>low</sup> recruited macrophages (RM). KC-N are TIM4<sup>+</sup> cells, derived from KC progenitors and with transcriptional characteristics near to normal KC-H. KN-RM are TIM4<sup>-</sup> negative cells, derived from Mo, though transcriptionally more similar to KC-N. KN-RM constitute the 37% of macrophages in MASH model, but their number increases during weeks, occupying a niche within liver sinusoids similar to KC-H and KC-N niche. On the contrary, the Ly6C<sup>high/low</sup> RM are transcriptionally divergent from KN-RM and occupy niche around large vessels. In particular, Ly6C<sup>high</sup> RM express several genes common with circulating Mo (Ly6C<sup>high</sup> blood)<sup>1</sup>. Here, we analysed the public repository of RNA-seq data deposited by Seidman JS et al in order to assess differences in terms of energy metabolism pathways. As expected, Mo-MØ expressed lower or no KC markers (i.e. *Clec4f*, *Timd4* and *Cd163*) (Supplementary Figure 5A). However, all NASH macrophages, KC-N included, expressed LAM markers (i.e., *Trem2*, *Gpnmb* and *Spp1*) (Supplementary Figure 5A), highlighting that some contamination existed in the flow cytometry method. Analysing the mitochondrial energy metabolism (MEM) pathway we found that MASH macrophages, and especially Mo-MØ presented an upregulated profile compared to normal KC-H, and very similar to the circulating Mo (Supplementary Figure 5B). Of interest, KC-N, which constitute the TIM4<sup>+</sup> cells during MASH, present a profile intermediate between KC-H and KN-RM (Supplementary Figure 5B). While, for unknown reason only the Ly6C<sup>low</sup> RM showed a strong downregulation of MEM pathway (Supplementary Figure 5B). However, Ly6C<sup>low</sup> RM represent only the 6% of whole macrophages, with a potential role in tissue repairing mechanisms, while other authors attributed these cells to patrolling monocytes. The volcano plots, showing MEM DEGs of the two most representative Mo-MØ populations (KN-RM vs KC-H, and Ly6c<sup>high</sup> RM vs KC-H) highlighted a prominent upregulated profile in comparison with normal KC-H. Out of 89 genes composing the MEM pathway, KN-RM had 19 DEGs (18 upregulated and 1 downregulated), while Ly6c<sup>high</sup> RM had 9 DEGs (8 upregulated and 1 downregulated) (Supplementary Figure 5C). In accordance with this, the glycolytic pathway was prominently enhanced in MASH macrophages (Supplementary Figure 5d). As shown by volcano-plot 4 genes out of 20 were significantly up-regulated in KN-RM and 7 genes in Ly6C<sup>high</sup> RM compared to KC-H (Supplementary Figure 5E). Collectively these results underline the enhancement of MEM and glycolysis pathways in recruited macrophages compared to normal resident macrophages during MASH.

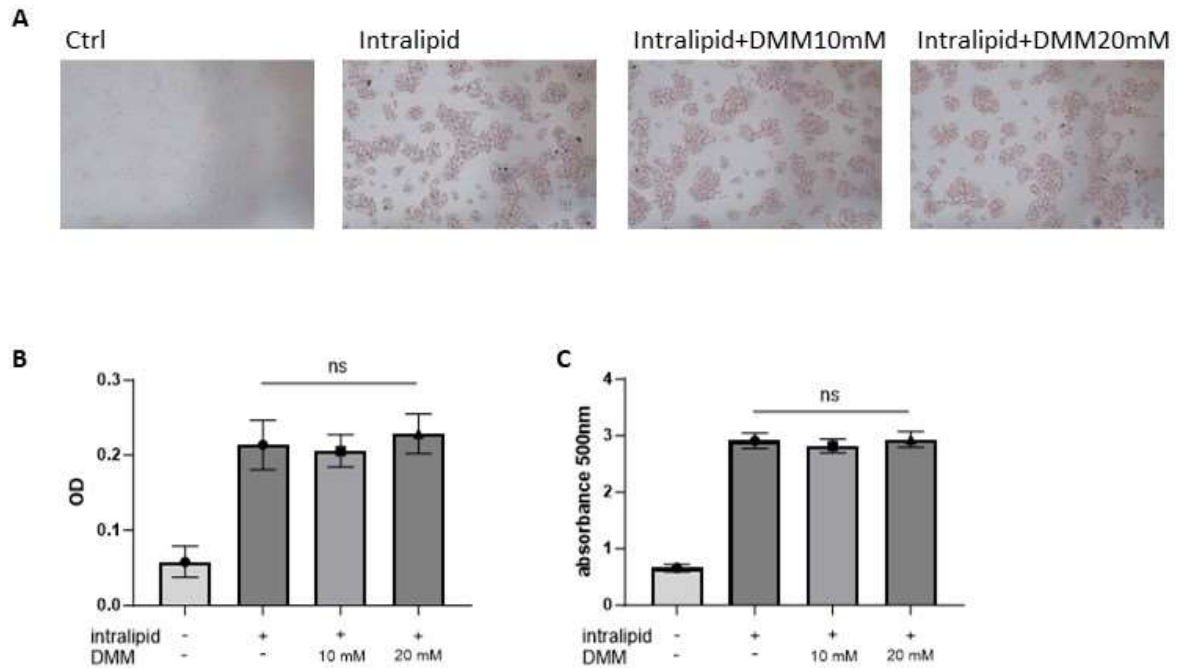

**Figure S6. DMM does not affect hepatocyte lipid accumulation. Related to Figure 7.**

HepG2 cells were exposed to 8% intralipid (Baxter) to induce the steatotic condition and simultaneously treated with DMM (10 mM and 20 mM) for 48 h. A. Pictures of HepG2 stained with Oil Red O to visualize lipid droplets. B. Quantification of optical density of A by FiJi (ImageJ) software. C. Lipid quantification by measurement of Oil Red O absorbance at 500nm.

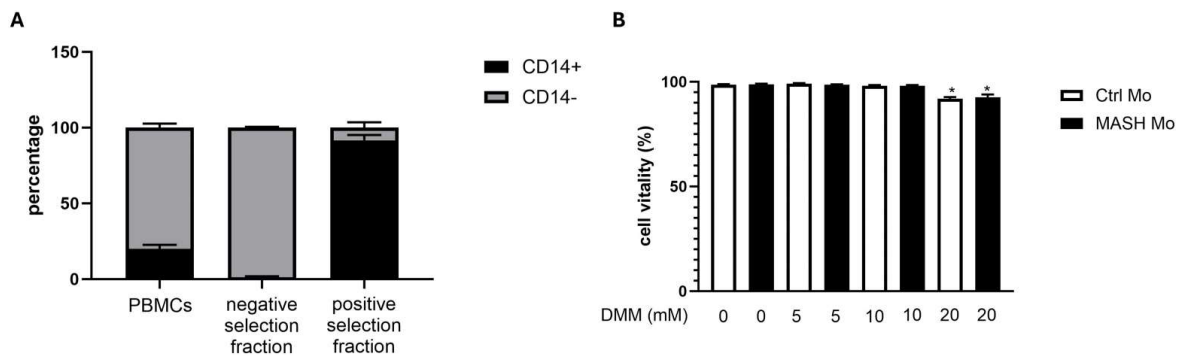

**Figure S7. (A) Percentage of CD14+ cells in total PBMCs and fractions obtained after monocyte isolation with EasySep™ Human CD14 Positive Selection Kit II (Stemcell Technologies, Grenoble, France). Related to Figure 1, Figure 2, Figure 3, Figure 4 and Figure 5. Determined by FACS analysis on three different isolations.**

**(B) Cell vitality of ctrl Mo and MASH Mo after 4 hours exposure to increasing concentrations of DMM (dimethyl malonate). Related to Figure 5.**

Cell vitality was determined with trypan blue staining and living cell count with TC10™ Automated Cell Counter (Bio Rad Laboratories Inc, Segrate (MI), Italy).



| Full name                                                                                            | Gene ID  |
|------------------------------------------------------------------------------------------------------|----------|
| Arrestin domain containing 3                                                                         | ARRDC3   |
| Ankyrin repeat and SOCS box containing 1                                                             | ASB1     |
| ATP synthase, H <sup>+</sup> transporting, mitochondrial F1 complex, alpha subunit 1, cardiac muscle | ATP5A1   |
| ATP synthase, H <sup>+</sup> transporting, mitochondrial F1 complex, beta polypeptide                | ATP5B    |
| ATP synthase, H <sup>+</sup> transporting, mitochondrial F1 complex, gamma polypeptide               | ATP5C1   |
| ATP synthase, H <sup>+</sup> transporting, mitochondrial Fo complex, subunit B1                      | ATP5F1   |
| ATP synthase, H <sup>+</sup> transporting, mitochondrial Fo complex, subunit C1 (subunit 9)          | ATP5G1   |
| ATP synthase, H <sup>+</sup> transporting, mitochondrial Fo complex, subunit C2 (subunit 9)          | ATP5G2   |
| ATP synthase, H <sup>+</sup> transporting, mitochondrial Fo complex, subunit C3 (subunit 9)          | ATP5G3   |
| ATP synthase, H <sup>+</sup> transporting, mitochondrial Fo complex, subunit d                       | ATP5H    |
| ATP synthase, H <sup>+</sup> transporting, mitochondrial Fo complex, subunit E                       | ATP5I    |
| ATP synthase, H <sup>+</sup> transporting, mitochondrial Fo complex, subunit F6                      | ATP5J    |
| ATP synthase, H <sup>+</sup> transporting, mitochondrial Fo complex, subunit F2                      | ATP5J2   |
| ATP synthase, H <sup>+</sup> transporting, mitochondrial Fo complex, subunit G                       | ATP5L    |
| ATP synthase, H <sup>+</sup> transporting, mitochondrial F1 complex, O subunit                       | ATP5O    |
| Cytochrome c oxidase subunit IV isoform 1                                                            | COX4I1   |
| Cytochrome c oxidase subunit Va                                                                      | COX5A    |
| Cytochrome c oxidase subunit Vb                                                                      | COX5B    |
| Cytochrome c oxidase subunit VIa polypeptide 1                                                       | COX6A1   |
| Cytochrome c oxidase subunit VIa polypeptide 2                                                       | COX6A2   |
| Cytochrome c oxidase subunit VIb polypeptide 1 (ubiquitous)                                          | COX6B1   |
| Cytochrome c oxidase subunit Vic                                                                     | COX6C    |
| Cytochrome c oxidase subunit VIIa polypeptide 2 (liver)                                              | COX7A2   |
| Cytochrome c oxidase subunit VIIa polypeptide 2 like                                                 | COX7A2L  |
| Cytochrome c oxidase subunit VIIb                                                                    | COX7B    |
| Cytochrome c oxidase subunit VIIIA (ubiquitous)                                                      | COX8A    |
| Cytochrome b-561 domain containing 1                                                                 | CYB561D1 |
| Cytochrome c-1                                                                                       | CYC1     |
| DnaJ (Hsp40) homolog, subfamily B, member 1                                                          | DNAJB1   |
| Endothelin 1                                                                                         | EDN1     |
| Growth arrest and DNA-damage-inducible, beta                                                         | GADD45B  |
| Heat shock 70kDa protein 1A                                                                          | HSPA1A   |
| Heat shock 70kDa protein 1B                                                                          | HSPA1B   |
| Low density lipoprotein receptor-related protein 5-like                                              | LRP5L    |
| NADH dehydrogenase (ubiquinone) 1 alpha subcomplex, 1, 7.5kDa                                        | NDUFA1   |
| NADH dehydrogenase (ubiquinone) 1 alpha subcomplex, 10, 42kDa                                        | NDUFA10  |
| NADH dehydrogenase (ubiquinone) 1 alpha subcomplex, 11, 14.7kDa                                      | NDUFA11  |

|                                                                                   |          |
|-----------------------------------------------------------------------------------|----------|
| NADH dehydrogenase (ubiquinone) 1 alpha subcomplex, 2, 8kDa                       | NDUFA2   |
| NADH dehydrogenase (ubiquinone) 1 alpha subcomplex, 3, 9kDa                       | NDUFA3   |
| NADH dehydrogenase (ubiquinone) 1 alpha subcomplex, 4, 9kDa                       | NDUFA4   |
| NADH dehydrogenase (ubiquinone) 1 alpha subcomplex, 5, 13kDa                      | NDUFA5   |
| NADH dehydrogenase (ubiquinone) 1 alpha subcomplex, 6, 14kDa                      | NDUFA6   |
| NADH dehydrogenase (ubiquinone) 1 alpha subcomplex, 8, 19kDa                      | NDUFA8   |
| NADH dehydrogenase (ubiquinone) 1, alpha/beta subcomplex, 1, 8kDa                 | NDUFAB1  |
| NADH dehydrogenase (ubiquinone) 1 beta subcomplex, 10, 22kDa                      | NDUFB10  |
| NADH dehydrogenase (ubiquinone) 1 beta subcomplex, 2, 8kDa                        | NDUFB2   |
| NADH dehydrogenase (ubiquinone) 1 beta subcomplex, 3, 12kDa                       | NDUFB3   |
| NADH dehydrogenase (ubiquinone) 1 beta subcomplex, 4, 15kDa                       | NDUFB4   |
| NADH dehydrogenase (ubiquinone) 1 beta subcomplex, 5, 16kDa                       | NDUFB5   |
| NADH dehydrogenase (ubiquinone) 1 beta subcomplex, 6, 17kDa                       | NDUFB6   |
| NADH dehydrogenase (ubiquinone) 1 beta subcomplex, 7, 18kDa                       | NDUFB7   |
| NADH dehydrogenase (ubiquinone) 1 beta subcomplex, 8, 19kDa                       | NDUFB8   |
| NADH dehydrogenase (ubiquinone) 1 beta subcomplex, 9, 22kDa                       | NDUFB9   |
| NADH dehydrogenase (ubiquinone) 1, subcomplex unknown, 1, 6kDa                    | NDUFC1   |
| NADH dehydrogenase (ubiquinone) 1, subcomplex unknown, 2, 14.5kDa                 | NDUFC2   |
| NADH dehydrogenase (ubiquinone) Fe-S protein 1, 75kDa (NADH-coenzyme Q reductase) | NDUFS1   |
| NADH dehydrogenase (ubiquinone) Fe-S protein 2, 49kDa (NADH-coenzyme Q reductase) | NDUFS2   |
| NADH dehydrogenase (ubiquinone) Fe-S protein 3, 30kDa (NADH-coenzyme Q reductase) | NDUFS3   |
| NADH dehydrogenase (ubiquinone) Fe-S protein 4, 18kDa (NADH-coenzyme Q reductase) | NDUFS4   |
| NADH dehydrogenase (ubiquinone) Fe-S protein 5, 15kDa (NADH-coenzyme Q reductase) | NDUFS5   |
| NADH dehydrogenase (ubiquinone) Fe-S protein 6, 13kDa (NADH-coenzyme Q reductase) | NDUFS6   |
| NADH dehydrogenase (ubiquinone) Fe-S protein 7, 20kDa (NADH-coenzyme Q reductase) | NDUFS7   |
| NADH dehydrogenase (ubiquinone) Fe-S protein 8, 23kDa (NADH-coenzyme Q reductase) | NDUFS8   |
| NADH dehydrogenase (ubiquinone) flavoprotein 1, 51kDa                             | NDUFV1   |
| NADH dehydrogenase (ubiquinone) flavoprotein 2, 24kDa                             | NDUFV2   |
| NADH dehydrogenase (ubiquinone) flavoprotein 3, 10kDa                             | NDUFV3   |
| Pyrophosphatase (inorganic) 1                                                     | PPA1     |
| Succinate dehydrogenase complex, subunit A, flavoprotein (Fp)                     | SDHA     |
| Succinate dehydrogenase complex, subunit B, iron sulfur (Ip)                      | SDHB     |
| Succinate dehydrogenase complex, subunit C, integral membrane protein, 15kDa      | SDHC     |
| Succinate dehydrogenase complex, subunit D, integral membrane protein             | SDHD     |
| Solute carrier family 25 (mitochondrial carrier phosphate carrier), member 25     | SLC25A25 |
| Ubiquinol-cytochrome c reductase, complex III subunit XI                          | UQCRC1   |
| Ubiquinol-cytochrome c reductase core protein I                                   | UQCRC1   |
| Ubiquinol-cytochrome c reductase core protein II                                  | UQCRC2   |
| Ubiquinol-cytochrome c reductase, Rieske iron-sulfur polypeptide 1                | UQCRFS1  |
| Ubiquinol-cytochrome c reductase hinge protein                                    | UQCRH    |
| Ubiquinol-cytochrome c reductase, complex III subunit VII, 9.5kDa                 | UQCRQ    |

**Table S1. List of genes from PrimePCR™ array “Mitochondria Energy Metabolism Plus” (Bio-Rad Laboratories Inc, Segrate (MI), Italy). Related to Figure 4.**

| Variable                          | N (%)            |
|-----------------------------------|------------------|
| Male                              | 16 (61.5)        |
| Hypertension                      | 10 (38.5)        |
| Diabetes Mellitus                 | 20 (77)          |
| Dyslipidaemia                     | 12 (45)          |
|                                   | <b>Mean ± SD</b> |
| Age                               | 60.24 ± 9.78     |
| BMI                               | 30.89 ± 5.34     |
| AST (U/L)                         | 51.76 ± 21.32    |
| ALT (U/L)                         | 60.20 ± 26.99    |
| γ-GT (U/L)                        | 108.25 ± 200.63  |
| Alkaline phosphatase (U/L)        | 97.12 ± 45.22    |
| Total cholesterol (mg/dL)         | 164.25 ± 39.43   |
| HDL (mg/dL)                       | 41.32 ± 13.15    |
| LDL (mg/dL)                       | 99.25 ± 23.99    |
| Triglycerides (mg/dL)             | 135.24 ± 57.27   |
| Glucose (mg/dL)                   | 127.66 ± 59.72   |
| HbA1c (%)                         | 6.23 ± 1.21      |
| Haemoglobin (g/dL)                | 13.01 ± 2.51     |
| Leukocytes (x10 <sup>3</sup> /uL) | 5.42 ± 2.48      |
| Lymphocytes (%)                   | 28.95 ± 9.12     |
| Monocytes (%)                     | 7.54 ± 2.34      |
| Platelets (x10 <sup>3</sup> /uL)  | 135.95 ± 86.18   |

**Table S2. Baseline characteristics of patients. Related to Figure 1, Figure 2, Figure 3 and Figure 4.**

| S.No. | Gene                 | Forward primer        | Reverse primer             | Source                  |
|-------|----------------------|-----------------------|----------------------------|-------------------------|
| 1     | Human $\beta$ -actin | GGCATCGTGATGGACTCC    | GCTGGAAGGTGGACAG<br>CGA    | Invitrogen              |
| 2     | Human IL-1 $\beta$   | GGCTGCTCTGGGATTCTCTT  | TCGTGCACATAAGCCTC<br>GTT   | Invitrogen              |
| 3     | Human TNF- $\alpha$  | GTCTCTTCAAGGGCCAAGG   | CTCACAGGGCAATGAT<br>CCCA   | Invitrogen              |
| 4     | Human PGC-1 $\alpha$ | TGCATGAGTGTGTGCTCTGT  | CAGCACACTCGATGTC<br>ACTC   | Invitrogen              |
| 5     | Human TFAM           | TGATTCACCGCAGGAAAAGC  | CGAGTTTCGTCCTCTTT<br>AGCA  | Invitrogen              |
| 6     | Mouse $\beta$ -actin | TATAAAACCCGGCGGCGCA   | TCATCCATGGCGAACTG<br>GTG   | Invitrogen              |
| 7     | Mouse IL-1 $\beta$   | TGCCACCTTTTGACAGTGATG | TGATGTGCTGCTGCGAG<br>ATT   | Invitrogen              |
| 8     | Mouse TNF- $\alpha$  | ACTGAACTTCGGGGTGATCG  | CCACTTGGTGGTTTGTG<br>AGTG  | Invitrogen              |
| 10    | Mouse CD-163         | GGTGCTGGATCTCCTGGTTG  | CAGGAGCGTTAGTGAC<br>AGCA   | Invitrogen              |
| 11    | Mouse MCP1           | CACTCACCTGCTGCTACTCA  | GCTTGGTGACAAAAAC<br>TACAGC | Invitrogen              |
| 12    | Human NDUFA1         | predesigned           | predesigned                | Sigma-<br>Aldrich       |
| 13    | Human NDUFA8         | Predesigned           | Predesigned                | Sigma-<br>Aldrich       |
| 14    | Human SDHB           | Predesigned           | Predesigned                | Sigma-<br>Aldrich       |
| 15    | Human COX4I1         | Predesigned           | Predesigned                | Sigma-<br>Aldrich       |
| 16    | Human COX5B          | Predesigned           | Predesigned                | Sigma-<br>Aldrich       |
| 17    | Human ATP5G2         | Predesigned           | Predesigned                | Sigma-<br>Aldrich       |
| 18    | Mouse CCR2           | Predesigned           | Predesigned                | Bio-Rad<br>Laboratories |
| 19    | Mouse CX3CR1         | Predesigned           | Predesigned                | Bio-Rad<br>Laboratories |
| 20    | Mouse GPNMB          | Predesigned           | Predesigned                | Bio-Rad<br>Laboratories |
| 21    | Mouse CLEC4F         | Predesigned           | Predesigned                | Bio-Rad<br>Laboratories |

| S.No. | Gene                 | Forward primer        | Reverse primer            | Source                  |
|-------|----------------------|-----------------------|---------------------------|-------------------------|
| 1     | Human $\beta$ -actin | GGCATCGTGATGGACTCC    | GCTGGAAGGTGGACAG<br>CGA   | Invitrogen              |
| 2     | Human IL-1 $\beta$   | GGCTGCTCTGGGATTCTCTT  | TCGTGCACATAAGCCTC<br>GTT  | Invitrogen              |
| 3     | Human TNF- $\alpha$  | GTCTCTTCAAGGGCCAAGG   | CTCACAGGGCAATGAT<br>CCCA  | Invitrogen              |
| 4     | Human PGC-1 $\alpha$ | TGCATGAGTGTGTGCTCTGT  | CAGCACACTCGATGTC<br>ACTC  | Invitrogen              |
| 5     | Human TFAM           | TGATTCACCGCAGGAAAAGC  | CGAGTTTCGTCCTCTTT<br>AGCA | Invitrogen              |
| 6     | Mouse $\beta$ -actin | TATAAAACCCGGCGGCGCA   | TCATCCATGGCGAACTG<br>GTG  | Invitrogen              |
| 7     | Mouse IL-1 $\beta$   | TGCCACCTTTTGACAGTGATG | TGATGTGCTGCTGCGAG<br>ATT  | Invitrogen              |
| 8     | Mouse TNF- $\alpha$  | ACTGAACTTCGGGGTGATCG  | CCACTTGGTGGTTTGTG<br>AGTG | Invitrogen              |
| 22    | Mouse TIMD4          | Predesigned           | Predesigned               | Bio-Rad<br>Laboratories |
| 23    | Mouse TREM2          | Predesigned           | Predesigned               | Bio-Rad<br>Laboratories |
| 24    | Mouse SPP1           | predesigned           | Predesigned               | Bio-Rad<br>Laboratories |

**Table S3. Primer sequences used in this study. Related to Figure 1, Figure 2, Figure 4, Figure 5 and Figure 7.**

#### Reference List

1. Seidman JS, Troutman TD, Sakai M, Gola A, Spann NJ, Bennett H, Bruni CM, Ouyang Z, Li RZ, Sun X, et al. Niche-Specific Reprogramming of Epigenetic Landscapes Drives Myeloid Cell Diversity in Nonalcoholic Steatohepatitis. *Immunity* 2020;52:1057-1074 e7.10.1016/j.immuni.2020.04.001
